# Supplementary material for: In-depth mesocrystal formation analysis of microwave-assisted synthesis of LiMnPO4nanostructures in organic solution
Source: Royal Society of Chemistry journal article supplement (doi:10.1039/c5ce01946j), 2015-11-27
Supplement: c5ce01946j1.pdf [file c5ce01946j1.pdf]

## Supplementary Information

### In-Depth Mesocrystal Formation Analysis of Microwave-Assisted Synthesis of LiMnPO<sub>4</sub> Nanostructures in Organic Solution

P. Voepel,<sup>a</sup> C. Suchomski,<sup>\*a</sup> A. Hofmann,<sup>a</sup> S. Gross,<sup>b,c</sup> P. Dolcet,<sup>b,c</sup> and B. M. Smarsly,<sup>\*a</sup>

**Table S1.** Refined structural parameters of LiMnPO<sub>4</sub> obtained by Rietveld analysis (a) 60 mmol L<sup>-1</sup> (undiluted), (b) 30 mmol L<sup>-1</sup> and (c) 20 mmol L<sup>-1</sup> (diluted approaches).

| Phase                                            | LiMnPO <sub>4</sub> (a)                                      | LiMnPO <sub>4</sub> (b)                                      | LiMnPO <sub>4</sub> (c)                                      |
|--------------------------------------------------|--------------------------------------------------------------|--------------------------------------------------------------|--------------------------------------------------------------|
| Space group                                      | <i>Pmnb</i> (#62)                                            |                                                              |                                                              |
| Lattice parameters, (Å)                          | <i>a</i> = 6.1037<br><i>b</i> = 10.4467<br><i>c</i> = 4.7461 | <i>a</i> = 6.1025<br><i>b</i> = 10.4467<br><i>c</i> = 4.7468 | <i>a</i> = 6.1012<br><i>b</i> = 10.4430<br><i>c</i> = 4.7446 |
| Unit-cell volume (Å <sup>3</sup> )               | 302.6275                                                     | 302.613                                                      | 302.303                                                      |
| Calc. density (g cm <sup>-3</sup> )              | 3.443                                                        | 3.443                                                        | 3.447                                                        |
| Average grain size (nm)                          | 65 ± 5                                                       | 37 ± 3                                                       | 35 ± 5                                                       |
| Average maximum microstrain (×10 <sup>-4</sup> ) | 15.6208                                                      | 15.0789                                                      | 19.2749                                                      |
| <i>R</i> <sub>wp</sub> [Bragg contributions] (%) | 12.9                                                         | 6.29                                                         | 14.8                                                         |
| Goodness of fit, $\chi^2$                        | 3.024                                                        | 2.03                                                         | 2.59                                                         |

**Table S2.** GC-MS results.

| Retention time (min) | Compound                                            | m/z [MP] | m/z [BP] | m/z [FP]     |
|----------------------|-----------------------------------------------------|----------|----------|--------------|
| 1.570                | Ar, CO <sub>2</sub>                                 | 40, 44   | -        | -            |
| 4.868                | Styrene                                             | 104      | 103      | 78, 77, 51   |
| 7.159                | 1-Phenylethanol<br>((±)-α-Methylbenzyl alcohol)     | 122      | 107      | 79, 77, 51   |
| 7.248                | 1-Phenylethyl chloride<br>(α-Methylbenzyl chloride) | 140      | 105      | 107, 79, 77  |
| 8.750                | 1-Phenylethyl acetate (α-Methylbenzyl acetate)      | 164      | 104      | 122, 73, 43  |
| 12.806, 12.936       | (SS or RR) and (RS) Bis(α-methylbenzyl) ether       | 164      | 104      | 122, 105, 43 |

MP = molecule peak, BP = base peak, FP = fragment peak, m/z = mass-to-charge ratio

**Table S3.** Atomic percentages of O, C, Li, P and Mn obtained by XPS analysis.

| Sample | %O   | %C   | %Li | %P   | %Mn | [Mn]:[Li]<br>(atomic ratio) | [P]:[Mn]<br>(atomic ratio) | Formula*                                          |
|--------|------|------|-----|------|-----|-----------------------------|----------------------------|---------------------------------------------------|
| 65 nm  | 50.1 | 20.1 | 8.2 | 11.5 | 9.8 | 1.2 (1)                     | 1.2 (1)                    | $\text{Li}_{0.884}\text{Mn}_{0.057}\text{MnPO}_4$ |
| 35 nm  | 39.9 | 33.7 | 7.2 | 9.4  | 9.4 | 1.3 (1)                     | 1.0 (1)                    | $\text{Li}_{0.831}\text{Mn}_{0.085}\text{MnPO}_4$ |

Theoretical values are given in parentheses. [\*] By neglecting the atomic P to Mn ratio.

**Table S4.** XPS peak analysis data.

| Core level                 | Peak position (eV)* |                                 |
|----------------------------|---------------------|---------------------------------|
|                            | 65 nm               | 35 nm                           |
| Mn $2p_{3/2}$              | 641.85              | 641.81                          |
| Mn $2p_{1/2}$              | 653.77              | 653.74                          |
| Mn $2p$ shake up satellite | 646.20, 658.56      | 646.15, 658.51                  |
| Mn $3s$                    | 89.44               | 89.64                           |
| O $1s$                     | 531.26              | 531.35 (lattice oxygen)         |
|                            | 532.81              | 533.33 ( $\text{H}_2\text{O}$ ) |
| Li $1s$                    | 55.38               | 55.35                           |
| P2p                        | 133.44              | 133.51                          |
| C $1s$                     | 284.60              | 284.60 (C–C)                    |
|                            | –                   | 285.81 (C–O)                    |
|                            | 287.65              | 288.55 (C=O)                    |

[\*] error margin:  $\pm 0.15$  eV

**Table S5.** Structural parameters of LiMnPO<sub>4</sub> for 35 nm grain size obtained by fitting of Mn K-edge EXAFS data.

| Atom Label | Number | Distance from Mn absorber | Distance (crystal structure) | $\sigma^2$ ( $10^{-3}$ ) |
|------------|--------|---------------------------|------------------------------|--------------------------|
| O1         | 2      | $(2.09 \pm 0.01)$ Å       | 2.14 Å                       | $(3.7 \pm 1.2)$ Å        |
| O2         | 1      | $(2.12 \pm 0.01)$ Å       | 2.17 Å                       | $(3.7 \pm 1.2)$ Å        |
| O3         | 3      | $(2.21 \pm 0.01)$ Å       | 2.26 Å                       | $(4.1 \pm 1.8)$ Å        |
| P1         | 1      | $(2.87 \pm 0.01)$ Å       | 2.87 Å                       | $(7.0 \pm 3.1)$ Å        |
| P2         | 4      | $(3.32 \pm 0.01)$ Å       | 3.32 Å                       | $(10.1 \pm 2.7)$ Å       |

$\sigma$  = Debye-Waller factor

**Table S6.** Structural parameters of LiMnPO<sub>4</sub> for 65 nm grain size obtained by fitting of Mn K-edge EXAFS data.

| Atom Label | Number | Distance from Mn absorber | Distance (crystal structure) | $\sigma^2$ ( $10^{-3}$ ) |
|------------|--------|---------------------------|------------------------------|--------------------------|
| O1         | 2      | $(2.09 \pm 0.01)$ Å       | 2.14 Å                       | $(2.4 \pm 1.4)$ Å        |
| O2         | 1      | $(2.12 \pm 0.01)$ Å       | 2.17 Å                       | $(2.4 \pm 1.4)$ Å        |
| O3         | 3      | $(2.21 \pm 0.01)$ Å       | 2.26 Å                       | $(2.7 \pm 2.0)$ Å        |
| P1         | 1      | $(2.89 \pm 0.01)$ Å       | 2.87 Å                       | $(11.4 \pm 4.7)$ Å       |
| P2         | 4      | $(3.34 \pm 0.01)$ Å       | 3.32 Å                       | $(12.3 \pm 5.4)$ Å       |

$\sigma$  = Debye-Waller factor

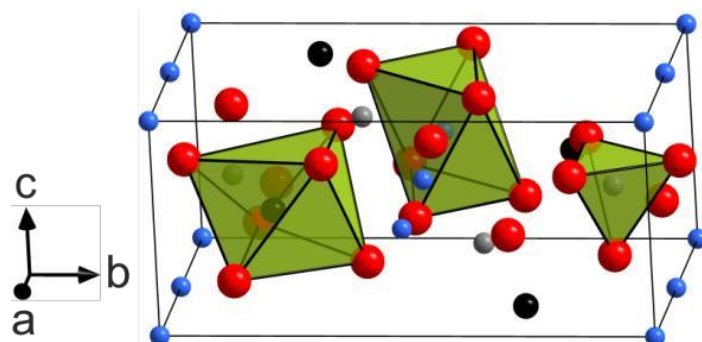

**Fig. S1.** Unit-cell of  $\text{LiMnPO}_4$  with orthorhombic space group  $Pmn21$  (#62).  $\text{P}^{5+}$  ions occupying the tetrahedral  $4(c)$  sites are shown in gray,  $\text{Li}^+$  and  $\text{Mn}^{2+}$  metal ions on both octahedral  $4(a)$  and  $4(c)$  sites represented in blue and black, and  $\text{O}^{2-}$  ions on  $4(c)$ ,  $4(c)$  and  $8(d)$  sites in red, respectively. The different coordination sites are indicated by colored polyhedra.

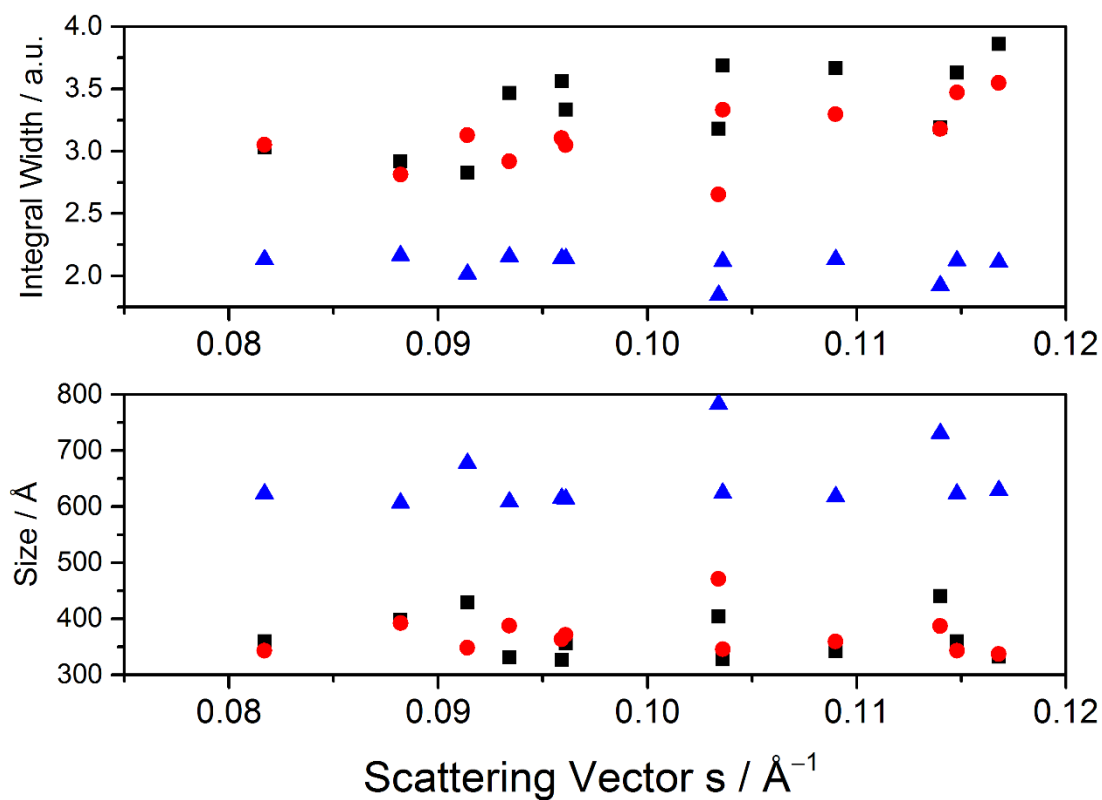

**Fig. S2.** Integral peak width and the calculated average grain size of the most prominent peaks for the 60 mmol  $\text{L}^{-1}$  ( $\blacktriangle$ ), 30 mmol  $\text{L}^{-1}$  ( $\bullet$ ) and 20 mmol  $\text{L}^{-1}$  ( $\blacksquare$ ) approaches.

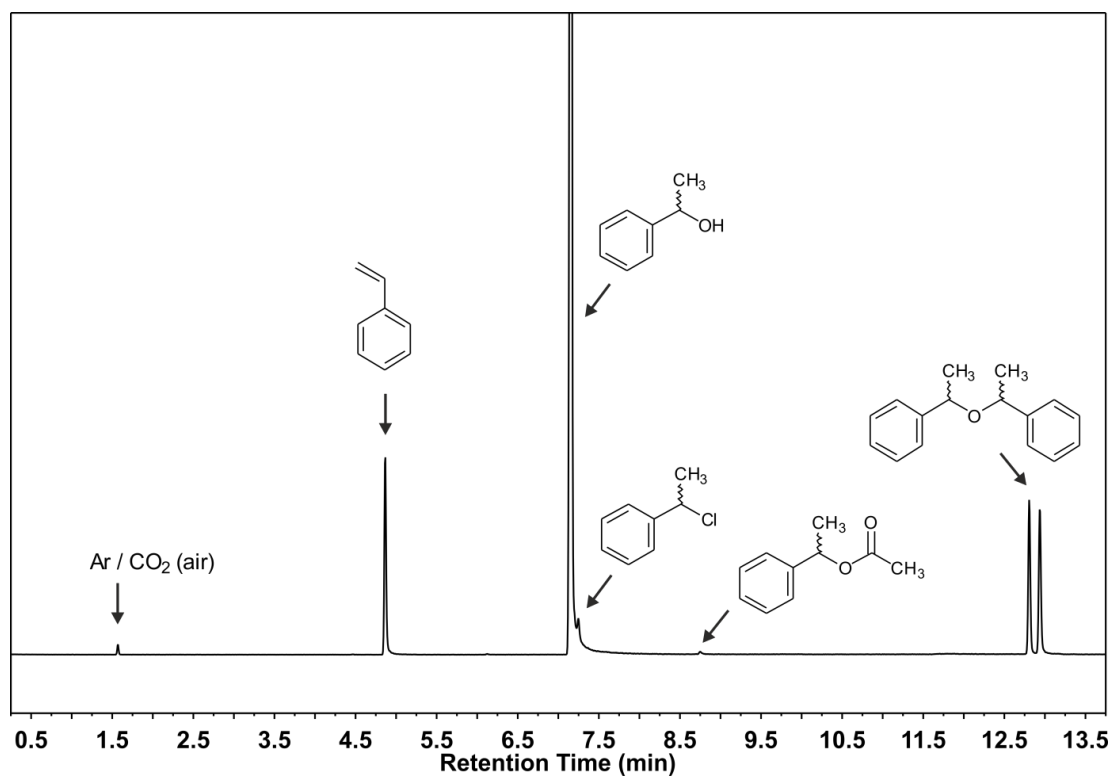

**Figure S3.** Gas chromatogram of the reaction mixture using *rac*-1-phenylethanol as reaction medium (diluted approach). **Table S2** below summarizes the GC–MS data.

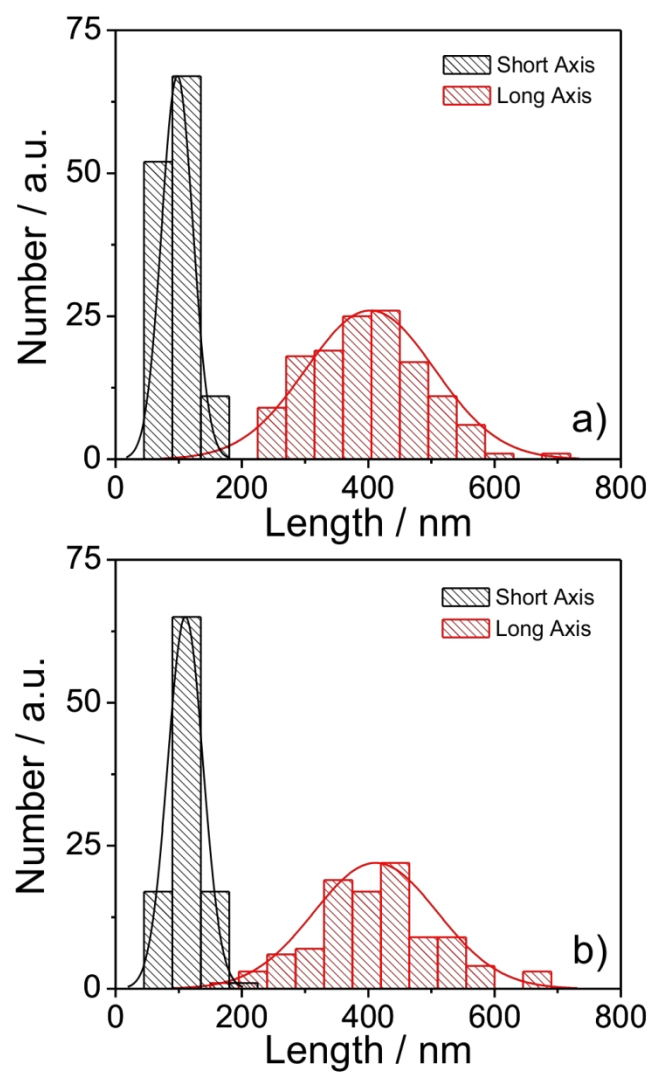

**Figure S4.** Size distribution on the particles based on SEM. Dilution factor 2 (a) and dilution factor 3 (b).

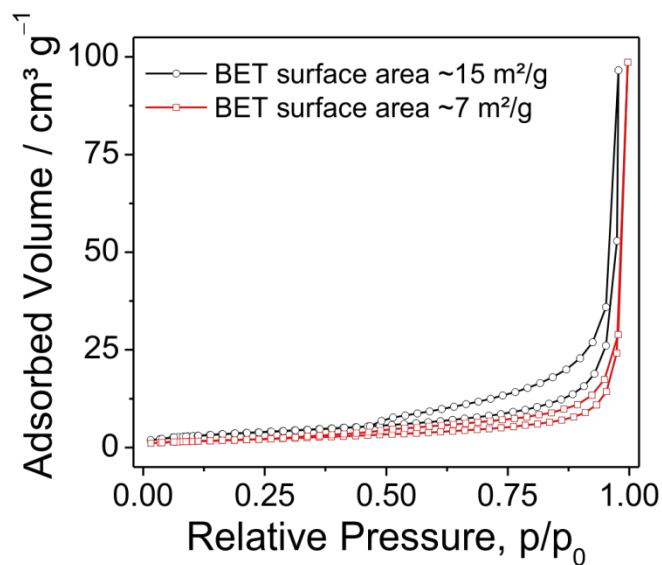

**Figure S5.** N<sub>2</sub> adsorption and desorption isotherms recorded at 77 K of synthesized LiMnPO<sub>4</sub> nanocrystals for grain sizes of approx. 35 nm (○) and 65 nm (●), respectively.

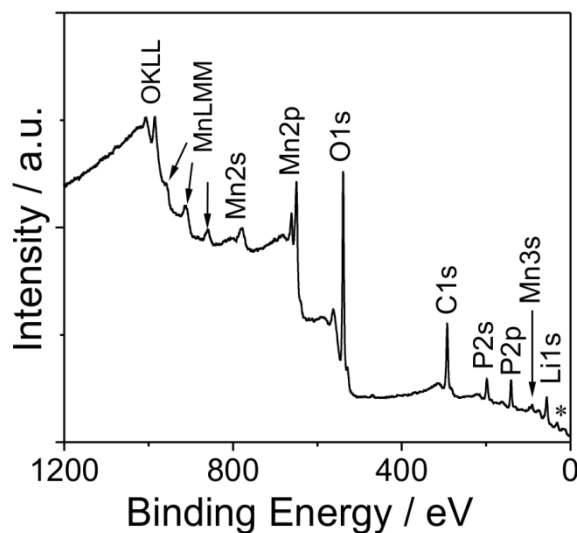

**Fig. S6.** XPS survey spectra of LiMnPO<sub>4</sub> for a grain size of 35 nm. Apart from a strong C 1s peak, which we associate with trace amounts of both acetate and 1-phenylethanol, only lithium, manganese, phosphorus and oxygen core levels can be observed. The O 2s region is indicated by an asterisk.

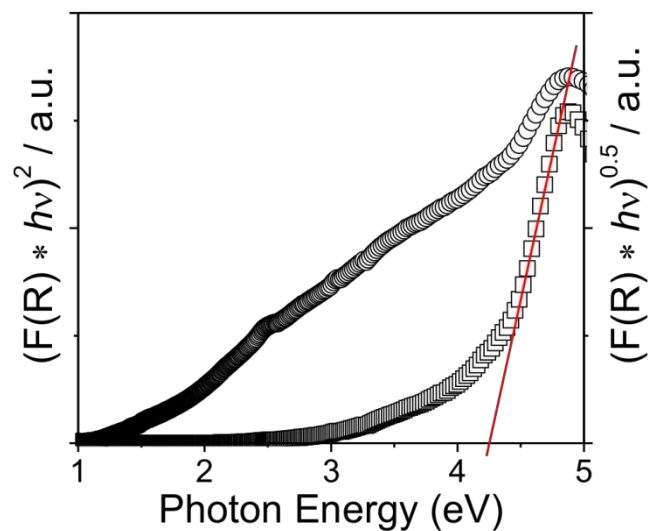

**Fig. S7.** Direct ( $\square$ ) and indirect ( $\circ$ ) optical transitions in nanocrystalline  $\text{LiMnPO}_4$  particles with an average crystalline domain size of 35 nm. The intercept of the red line with the abscissa yields to a direct band gap of  $E_g = (4.25 \pm 0.05)$  eV. Moreover, a weak indirect optical transition at photon energies of approx. 2.50 eV (equivalent to 495 nm) can be identified and attributed to crystal field  $d-d$  transition of  $\text{Mn}^{2+}$  ions on octahedral sites.

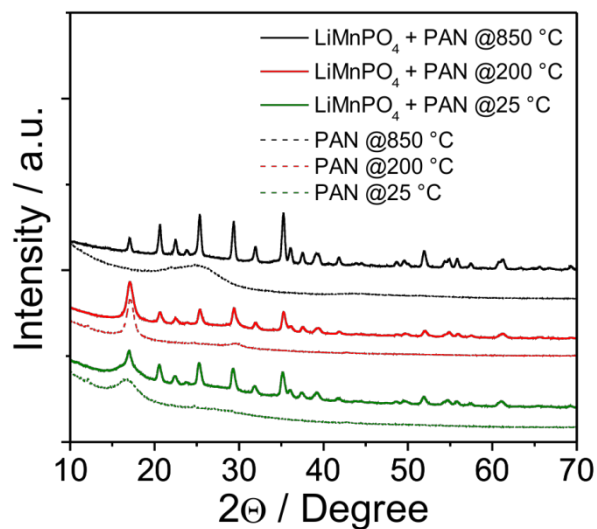

**Figure S8:** XRD data of the PAN/ $\text{LiMnPO}_4$  composite fiber material after different heat treatments (as made, stabilized and after carbonization).
